# Supplementary material
Source: ML conference proceedings conference paper supplement (https://proceedings.mlr.press/v97/zhu19a.html)
Supplement: Supplementary file [file zhu19a-supp.pdf]

## SUPPLEMENTARY FILE

# Transferable Clean-Label Poisoning Attacks on Deep Neural Nets

### 1. Proof of Proposition 1

2  $\implies$  1

For multi-class problems, the condition for  $\phi(\mathbf{x})$  to be classified as  $\ell_p$  is

$$\mathbf{w}_{\ell_p}^\top \phi(\mathbf{x}) + b_{\ell_p} > \mathbf{w}_i^\top \phi(\mathbf{x}) + b_i, \quad \text{for all } i \neq \ell_p.$$

Each of these constraints is linear, and is satisfied by a convex half-space. The region that satisfies all of these constraints is an intersection of convex half-spaces, and so is convex. Under condition (2),  $\phi(\mathbf{x}_t)$  is a convex combination of points in this convex region, and so  $\phi(\mathbf{x}_t)$  is itself in this convex region.

1  $\implies$  2

Suppose that (1) holds. Let

$$\mathcal{S} = \left\{ \sum_i c_i \phi(\mathbf{x}_p^j) \mid \sum_i c_i = 1, 0 \leq c_i \leq 1 \right\}$$

be the convex hull of the points  $\{\phi(\mathbf{x}_p^j)\}_{j=1}^k$ . Let  $\mathbf{u}_t = \arg \min_{\mathbf{u} \in \mathcal{S}} \|\mathbf{u} - \phi(\mathbf{x}_t)\|$  be the closest point to  $\phi(\mathbf{x}_t)$  in  $\mathcal{S}$ . If  $\|\mathbf{u}_t - \phi(\mathbf{x}_t)\| = 0$ , then (2) holds and the proof is complete. If  $\|\mathbf{u}_t - \phi(\mathbf{x}_t)\| > 0$ , then define the classifier function

$$f(\mathbf{z}) = (\mathbf{u}_t - \phi(\mathbf{x}_t))^\top (\mathbf{z} - \mathbf{u}_t).$$

Clearly  $f(\phi(\mathbf{x}_t)) < 0$ . By condition (1), there is some  $j$  with  $f(\phi(\mathbf{x}_p^j)) < 0$  as well. Consider the function

$$g(\eta) = \frac{1}{2} \|\mathbf{u}_t + \eta(\phi(\mathbf{x}_p^j) - \mathbf{u}_t) - \phi(\mathbf{x}_t)\|^2.$$

Because  $\mathbf{u}_t$  is the closest point to  $\phi(\mathbf{x}_t)$  in  $\mathcal{S}$ , and  $g$  is smooth, the derivative of  $g$  with respect to  $\eta$ , evaluated at  $\eta = 0$ , is 0. We can write this derivative condition as

$$g'(0) = (\mathbf{u}_t - \phi(\mathbf{x}_t))^\top (\phi(\mathbf{x}_p^j) - \mathbf{u}_t) = f(\phi(\mathbf{x}_p^j)) \geq 0.$$

However this statement is a contradiction, since  $f(\phi(\mathbf{x}_p^j)) < 0$ .

### 2. Comparison of Validation Accuracies

To make data poisoning attacks undetectable, in addition to making the perturbations to nonobvious, the accuracy of the model fine-tuned on the poisoned dataset shall not drop too significantly, compared with fine-tuning on the same (except for the poisons) clean dataset. Figure 1 shows that the drop in accuracy is indeed not obvious.

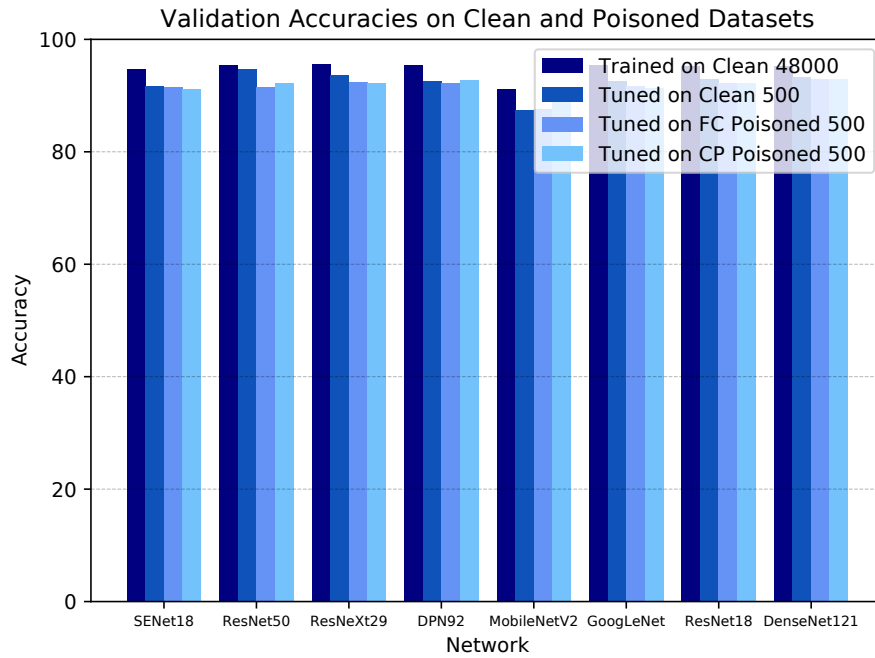

Figure 1: Accuracies on the whole CIFAR10 test for models trained or fine-tuned on different datasets. The fine-tuned models are initialized with the network trained on the first 4800 images of each class. There is little accuracy drop after fine-tuned on the poisoned datasets, compared with fine-tuning on the clean 500-image set directly.

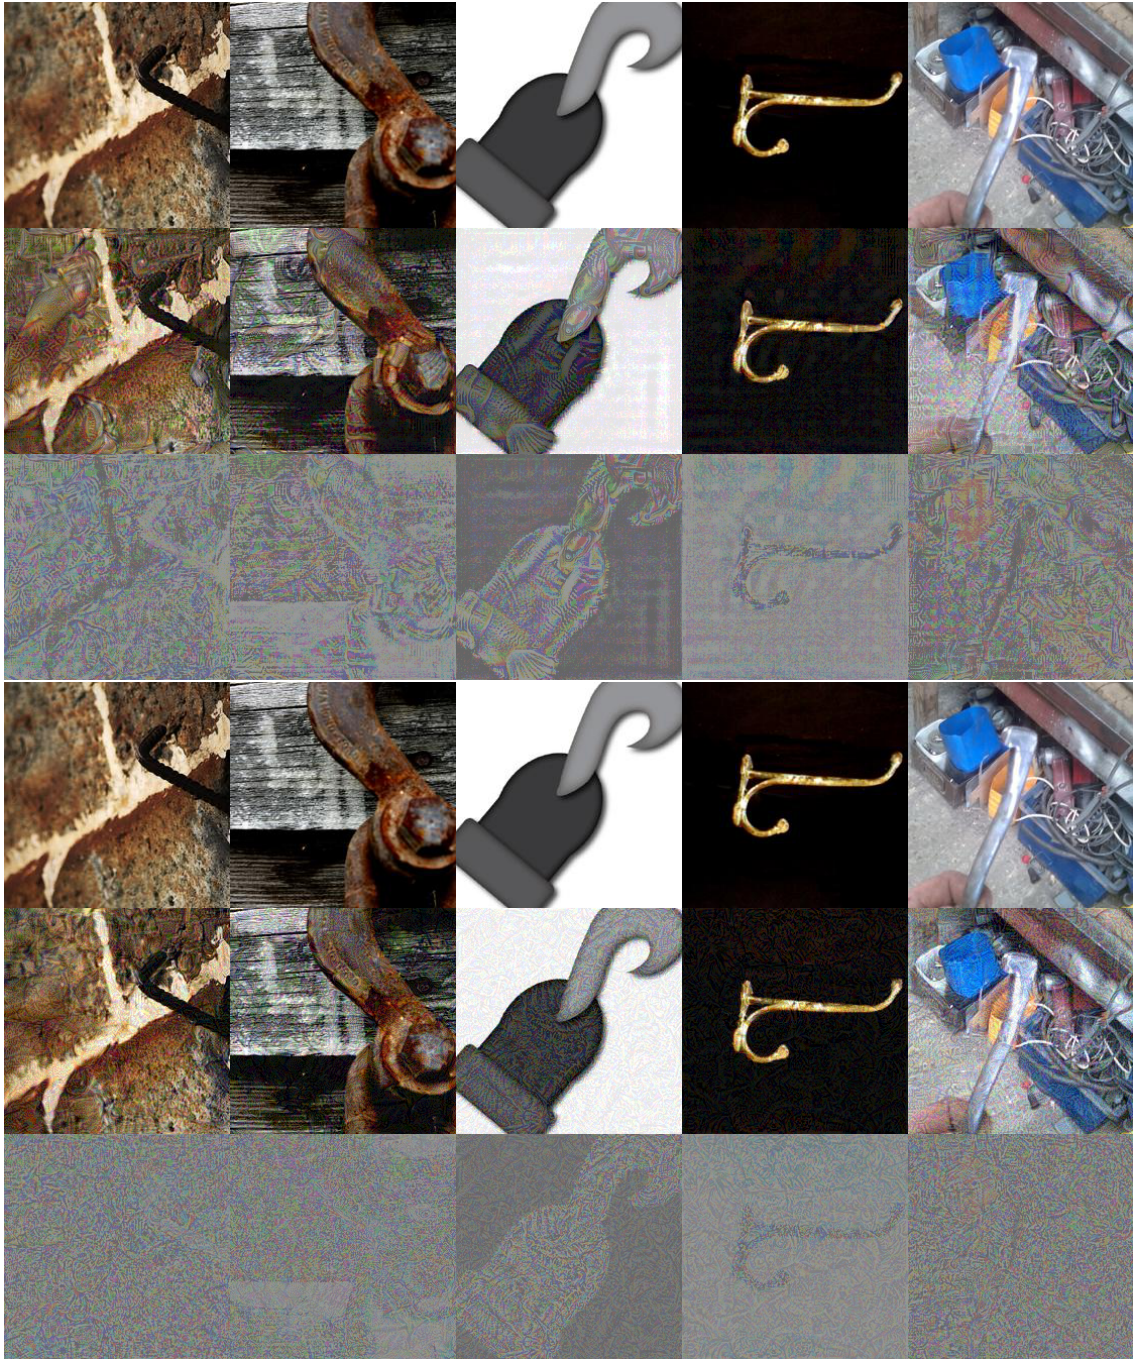

Figure 2: All the 5 poison images.

### 3. Details of the qualitative example

Both the target *fish* image and the five *hook* images used for crafting poisons come from the WebVision [1] dataset, which has the same taxonomy as the ImageNet dataset. Figure 2 gives all the five poison examples.

### References

- [1] Wen Li, Limin Wang, Wei Li, Eirikur Agustsson, and Luc Van Gool. Webvision database: Visual learning and understanding from web data. *arXiv preprint arXiv:1708.02862*, 2017.
